# Supplementary material for: Seed priming with lavender essential oil increases germination and seedling growth in saline and potentially toxic elements-contaminated soils
Source: PeerJ journal article supplement (doi:10.7717/peerj.20717), 2026-04-08
Supplement: Supplementary_material.pdf [file Supplementary_material.pdf]

## SUPPLEMENTARY MATERIAL

**Supplementary Table 1.** Description of the solution used for seed priming. The percentage of *L. angustifolia* essential oil (EO), H<sub>2</sub>O and Polisorbate 80 (P80) and the related code is also reported.

| Code             | EO (%) | Treatment                                            | Final Volume (mL) |
|------------------|--------|------------------------------------------------------|-------------------|
| LEO4%            | 4%     | 1.2 mL LEO + 0.18 mL P80 + 28.62 mL H <sub>2</sub> O | 30                |
| H <sub>2</sub> O | 0.0%   | 10 mL H <sub>2</sub> O                               | 10                |
| P80              | 0.0%   | 0,001 mL P80 + 9,999 mL H <sub>2</sub> O             | 10                |
| EO1              | 0.1%   | 0.25 mL LEO4% + 9.75 mL H <sub>2</sub> O             | 10                |
| EO2              | 0.2%   | 0.50 mL LEO4% + 9.50 mL H <sub>2</sub> O             | 10                |
| EO4              | 0.4%   | 1.00 mL LEO4% + 9.00 mL H <sub>2</sub> O             | 10                |
| EO8              | 0.8%   | 2.00 mL LEO4% + 8.00 mL H <sub>2</sub> O             | 10                |

**Supplementary Table 2.** Mean hypocotyl length (cm) of *A. millefolium*, *O. basilicum*, and *T. vulgaris*. The following substrate were considered: Arborea (Sal); Montevecchio (HM1); Su Suergiu (HM2) and Sand as control (C). The treatment tested were 0,1; 0,2; 0,4 and 0,8 % concentration (EO1; EO2; EO4 and EO8) of *L. angustifolia* EO and only water (H<sub>2</sub>O). Values are presented as mean ± standard deviation.

| Soil | Treatment        | Hypocotyl length (cm)   |                     |                         |
|------|------------------|-------------------------|---------------------|-------------------------|
|      |                  | <i>A. millefolium</i>   | <i>O. basilicum</i> | <i>T. vulgaris</i>      |
| Sal  | EO1              | 1.73±0.25               | 2.33±0.22           | 1.49±0.18 <sup>ab</sup> |
|      | EO2              | 1.75±0.24               | 2.31±0.33           | 1.39±0.15 <sup>ab</sup> |
|      | EO4              | 1.79±0.20               | 2.03±0.36           | 1.26±0.14 <sup>b</sup>  |
|      | EO8              | 1.73±0.24               | 2.16±0.34           | 1.52±0.18 <sup>a</sup>  |
|      | H <sub>2</sub> O | 1.70±0.18               | 2.14±0.37           | 1.35±0.22 <sup>ab</sup> |
| HM1  | EO1              | 1.86±0.27               | 2.38±0.35           | 1.98±0.34               |
|      | EO2              | 1.76±0.26               | 2.24±0.24           | 1.81±0.36               |
|      | EO4              | 1.69±0.28               | 2.53±0.32           | 1.88±0.31               |
|      | EO8              | 1.79±0.27               | 2.36±0.27           | 1.75±0.20               |
|      | H <sub>2</sub> O | 1.79±0.21               | 2.47±0.27           | 1.87±0.29               |
| HM2  | EO1              | 1.85±0.25               | 2.49±0.28           | 1.93±0.34               |
|      | EO2              | 1.87±0.27               | 2.43±0.30           | 1.76±0.32               |
|      | EO4              | 1.77±0.23               | 2.44±0.29           | 1.73±0.26               |
|      | EO8              | 1.87±0.30               | 2.45±0.29           | 1.87±0.28               |
|      | H <sub>2</sub> O | 1.78±0.27               | 2.43±0.34           | 1.93±0.24               |
| C    | EO1              | 1.95±0.26 <sup>a</sup>  | 2.51±0.21           | 2.08±0.28               |
|      | EO2              | 1.66±0.23 <sup>b</sup>  | 2.41±0.30           | 2.09±0.39               |
|      | EO4              | 1.80±0.29 <sup>ab</sup> | 2.42±0.29           | 1.86±0.30               |
|      | EO8              | 1.74±0.28 <sup>ab</sup> | 2.48±0.30           | 2.06±0.26               |
|      | H <sub>2</sub> O | 1.81±0.25 <sup>ab</sup> | 2.26±0.24           | 2.01±0.27               |

**Supplementary Table 3.** Formulas to calculate germination related variables (G: Germination percentage; MGT: Mean germination time; Z: Synchrony of the germination process; SVI: Seedling vigor index; Soil stress tolerance index: SSTI).

| Variable | Formula                                                | Explanation                                                                                                                                                                                                                                  |
|----------|--------------------------------------------------------|----------------------------------------------------------------------------------------------------------------------------------------------------------------------------------------------------------------------------------------------|
| G        | $\frac{\sum_{i=1}^k n_i}{N} \times 100$                | $n_i$ = number of seeds germinated at interval $i$<br>$N$ = total number of seeds germinated.                                                                                                                                                |
| MGT      | $\frac{\sum_{i=1}^k n_i t_i}{\sum_{i=1}^k n_i}$        | $n_i t_i$ = the product of seeds germinated at interval $i$ with the corresponding time interval.                                                                                                                                            |
| Z        | $\frac{\sum_{i=1}^k C_{ni,2}}{C_{\sum_{i=1}^k n_i,2}}$ | $C_{ni,2}$ = Combination of the seeds germinated in the $i^{\text{th}}$ time. two by two. thus, ranging between 0 (when at least two seeds could germinate. one at each time) and 1 (when germination of all seeds occurs at the same time). |
| SVI      | HL x G%                                                | HL correspond to hypocotyls length.<br>G% correspond to germination percentage.                                                                                                                                                              |
| SSTI     | $\frac{G_{Treatment}}{G_{H_2O}} \times 100$            | $G_{Treatment}$ = germination percentage for each treatment and soil (dose 0.01, 0,02, 0.04, and 0.08 percent).<br>$G_{H_2O}$ = mean germination percentage for the dose 0% for each soil type.                                              |
